# Supplementary material
Source: publisher figshare collection journal article supplement (https://acs.figshare.com/ndownloader/files/15635792)
Supplement: Supplementary file 1 [file 15635792]

# Supporting Information

## A Concise and Efficient Synthesis of Dapagliflozin

*Jun Yu\*, Ying Cao, HaiZhou Yu and JinJia Wang*

The Research Academy of Jiangsu Hansoh Pharmaceutical Co., LTD,  
Dongjin Road, Huaguoshan Avenue, Lianyungang, Jiangsu, 222069, P. R.  
China.

|                                                                          |    |
|--------------------------------------------------------------------------|----|
| <sup>1</sup> H NMR and <sup>13</sup> C NMR spectra for Compound <b>8</b> | S2 |
| Mass spectra for Compound <b>8</b> and Compound <b>9</b>                 | S3 |
| <sup>1</sup> H NMR and <sup>13</sup> C NMR spectra for Compound <b>9</b> | S4 |
| <sup>1</sup> H NMR and <sup>13</sup> C NMR spectra for Compound <b>1</b> | S5 |
| IR and Mass spectra for Compound <b>1</b>                                | S6 |
| DSC spectra for Compound <b>1</b>                                        | S7 |
| The HPLC condition of compound <b>9</b>                                  | S7 |
| The HPLC condition of compound <b>1</b>                                  | S8 |

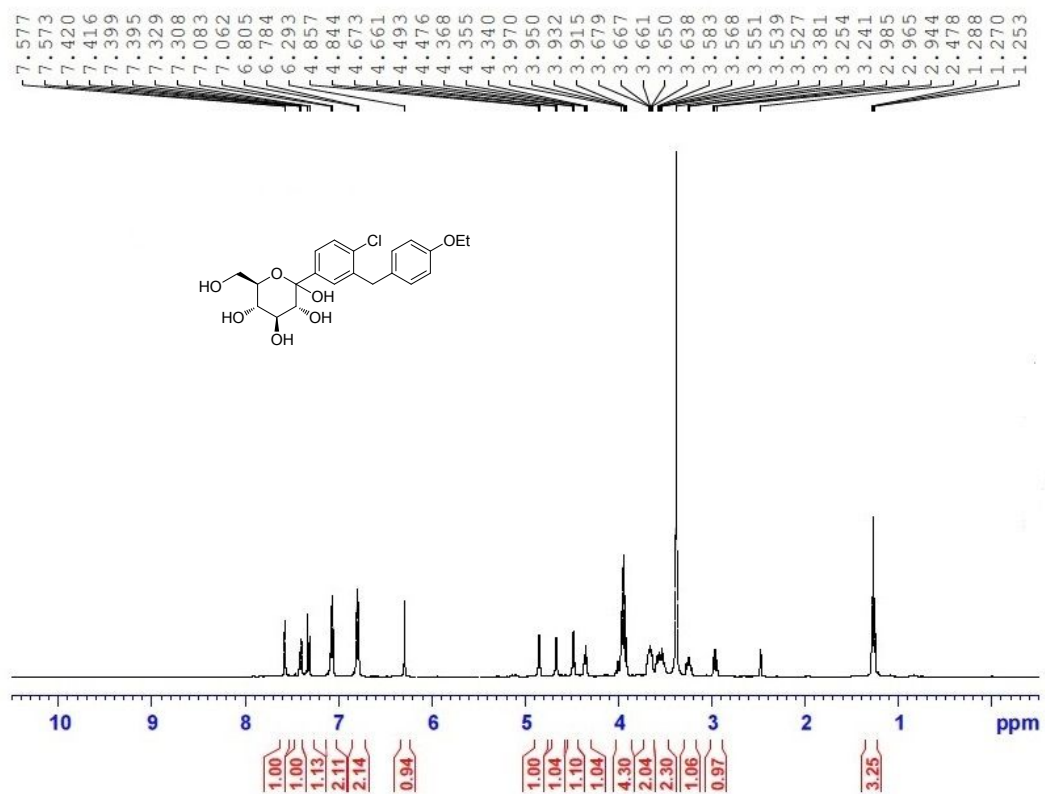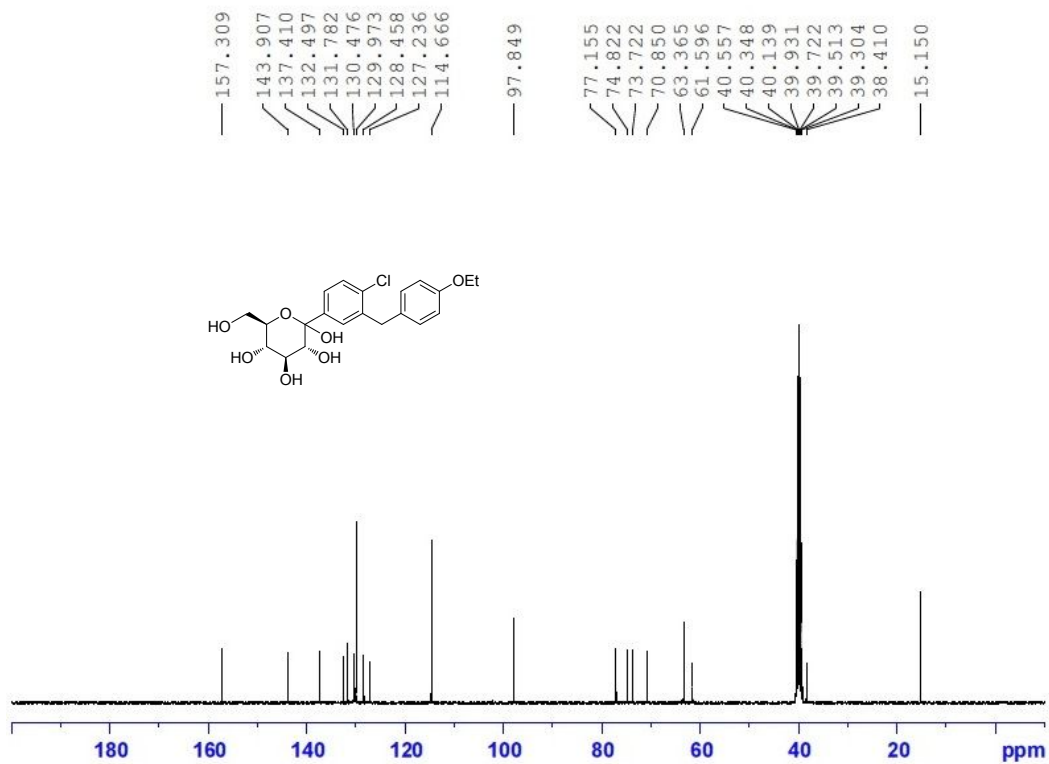

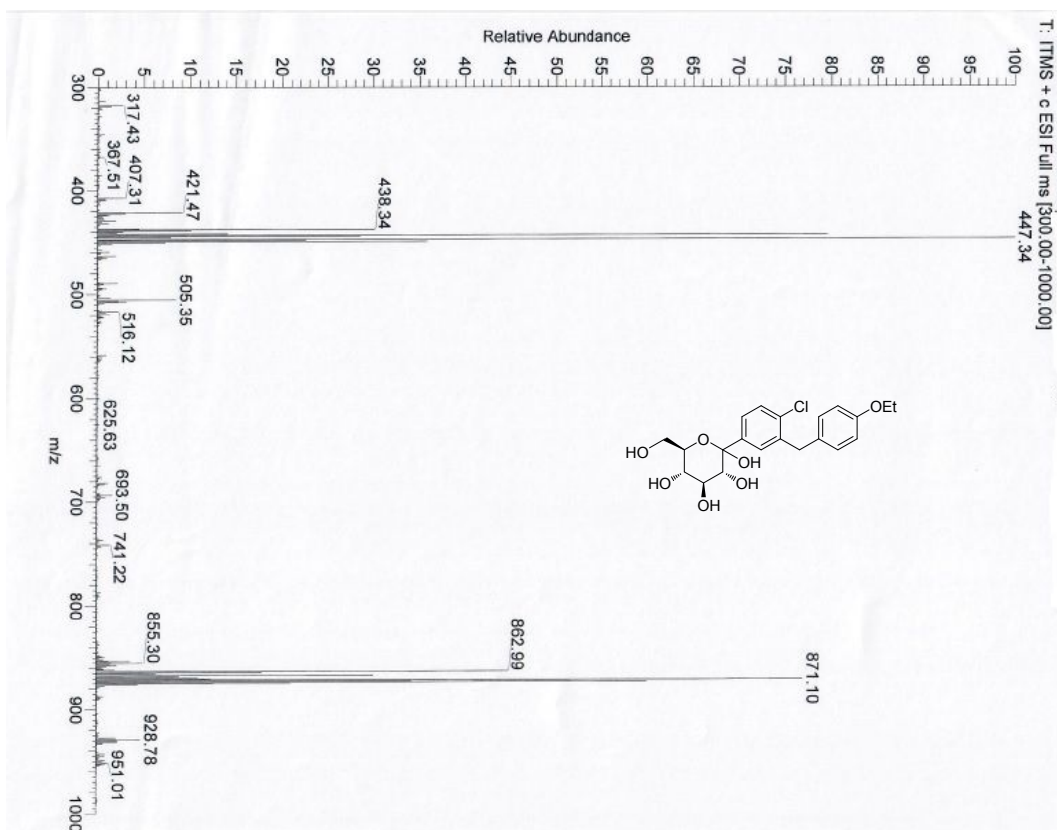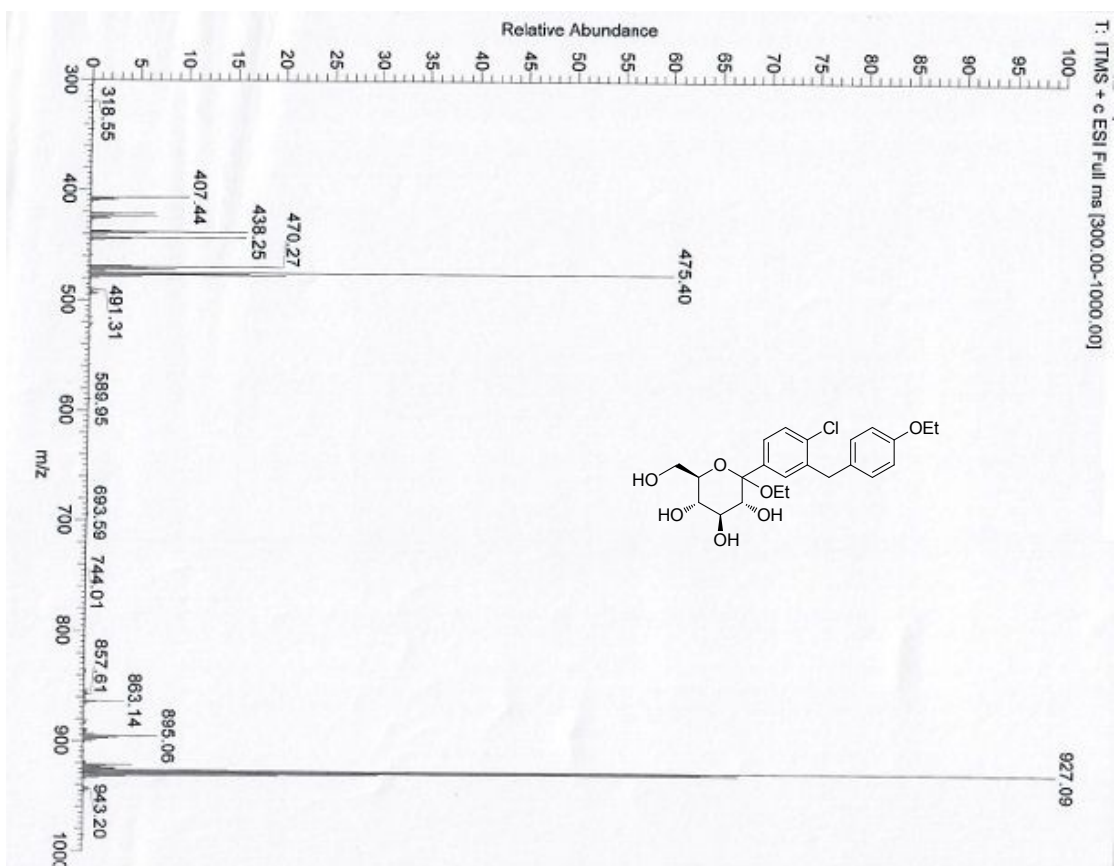

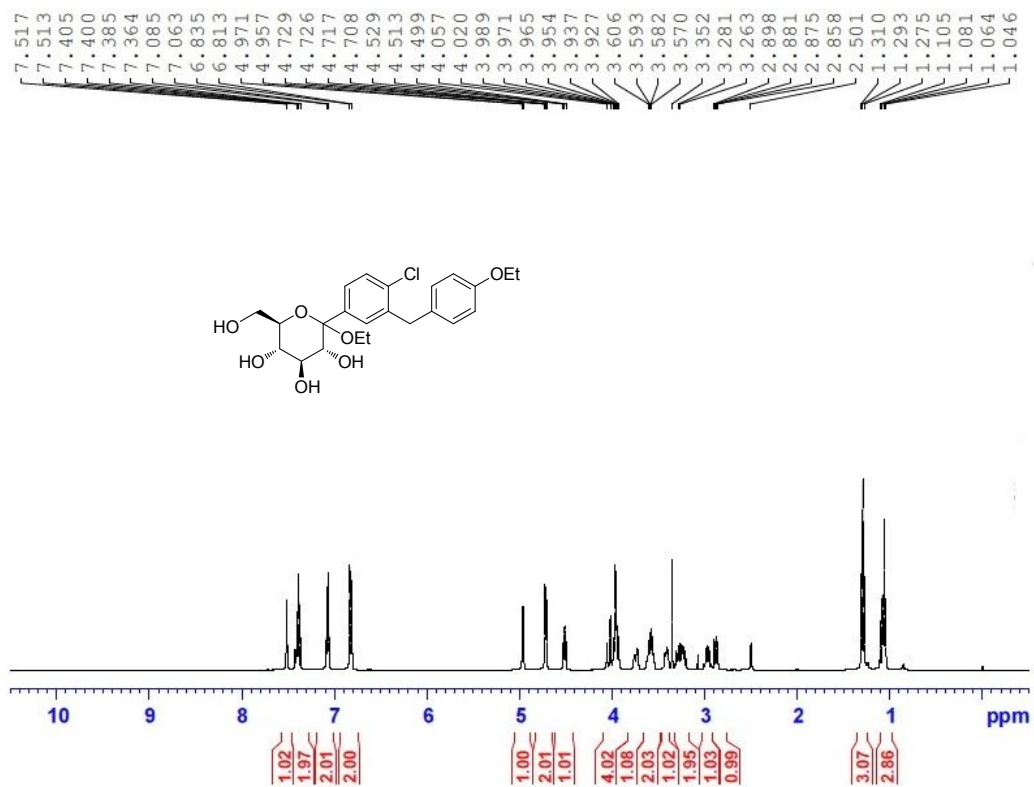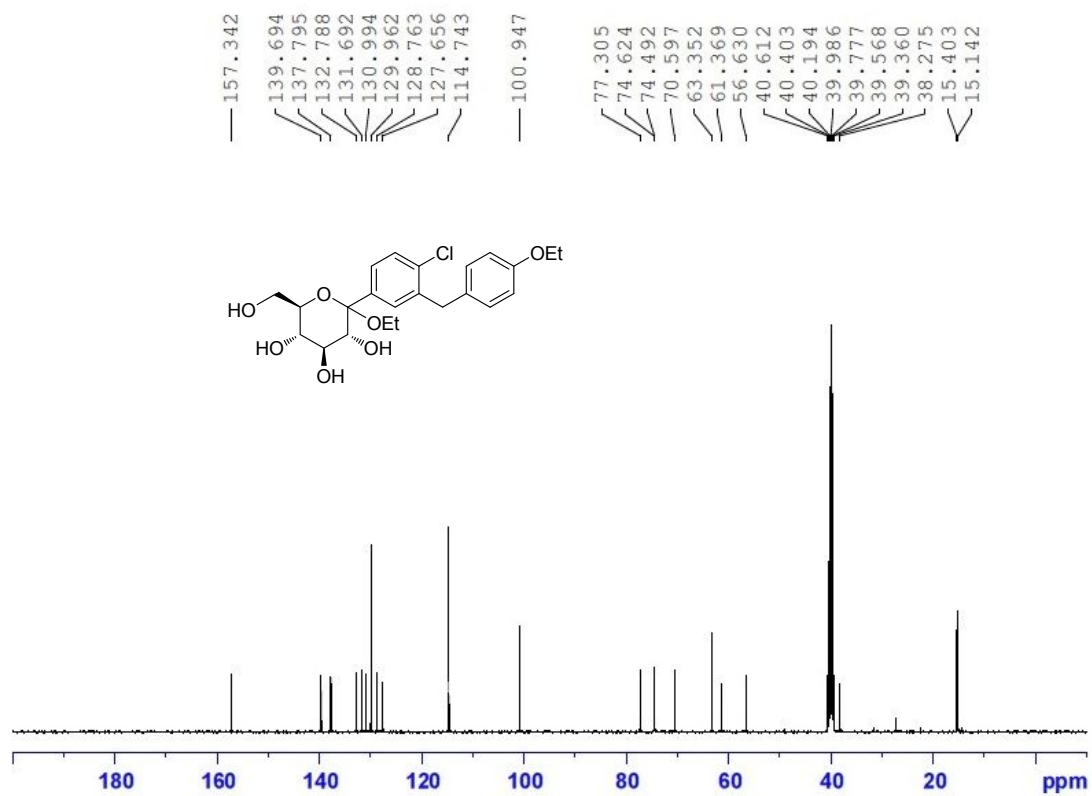



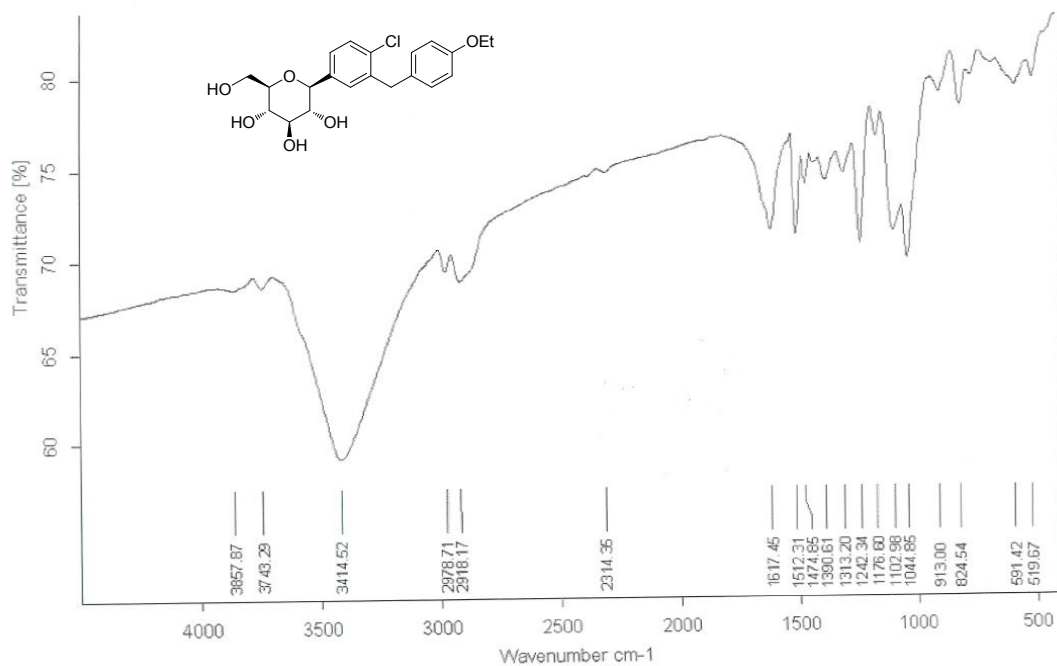

### User Spectra

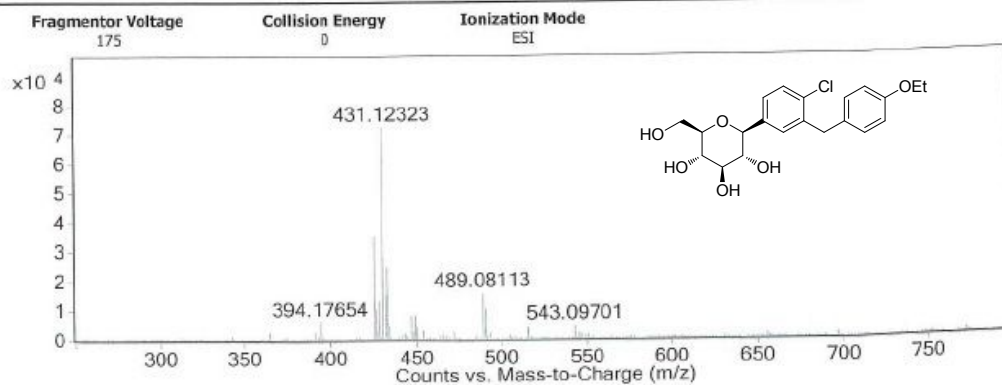

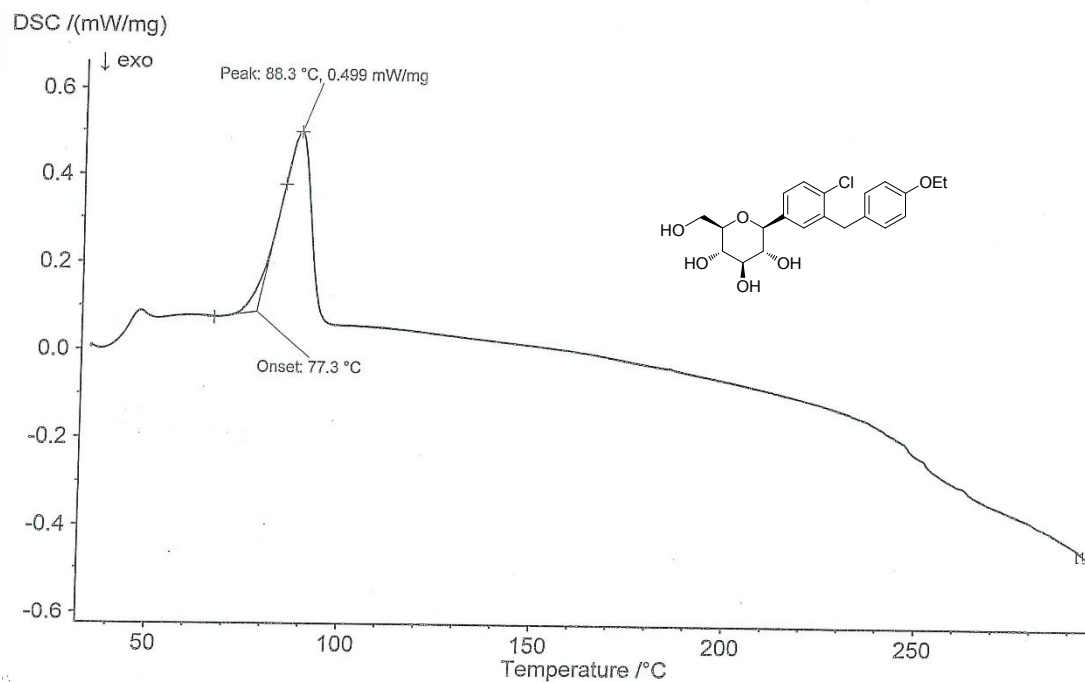

The HPLC condition of compound 9 was showed as below

|                     |                                                                                                                                                             |
|---------------------|-------------------------------------------------------------------------------------------------------------------------------------------------------------|
| Column:             | Octylsilane bounding silica gel as for filler (Phenomenex kinetex C <sub>8</sub> , 4.6 mm × 100 mm, 2.6 μm or other columns with similar column efficiency) |
| Flow Rate:          | 1.0 mL/min                                                                                                                                                  |
| Detector:           | UV 220 nm                                                                                                                                                   |
| Column Temperature: | 20°C                                                                                                                                                        |
| Injection Volume:   | 5 μL                                                                                                                                                        |

*Solution A:* Weigh accurately 0.5 mL of trifluoroacetic acid to 1000 mL of water, filter and degas.

*Solution B:* Weigh accurately 0.5 mL of trifluoroacetic acid to 800 mL of acetonitrile, add 200 mL of methanol, mix well, filter and degas.

*Mobile phase:* the gradient procedure is as follows:

| TIME (MIN) | SOLUTION A (%) | SOLUTION B (%) |
|------------|----------------|----------------|
| 0          | 70             | 30             |
| 23         | 25             | 75             |
| 28         | 10             | 90             |
| 33         | 10             | 90             |
| 35         | 70             | 30             |
| 40         | 70             | 30             |

This is only apparent purity (area %).

**The HPLC condition of compound 1 was showed as below**

Column: Five fluorinated phenyl bonded silica gel as filler (Phenomenex Kinetex F5, 4.6 mm × 100 mm, 2.6 μm or other columns with the similar polarity)  
Flow rate: 1.5 mL/min  
Detector: 220 nm  
Column temperature: 55°C  
Injection volume: 5 μL

*Solution A:* Weigh 2.7 g of monopotassium phosphate, dissolve and dilute with water to 1000 mL. Adjust the pH of solution to 3.0, mix well. Filter and degas.

*Solution B:* Acetonitrile.

*Mobile phase:* the gradient procedure is as follows:

| TIME (MIN) | SOLUTION A (%) | SOLUTION B (%) |
|------------|----------------|----------------|
| 0          | 85             | 15             |
| 25         | 60             | 40             |
| 38         | 20             | 80             |
| 43         | 85             | 15             |
| 48         | 85             | 15             |

This is only apparent purity (area %).
